# Supplementary material for: AgCl-doped CdSe quantum dots with near-IR photoluminescence
Source: publisher site journal article supplement (doi:10.3762/bjnano.8.117), 2017-05-29
Supplement: Additional file 1 [file 2190-4286-8-117-S1.pdf]

# **Supporting Information**

for

## **AgCl-doped CdSe quantum dots with near-IR photoluminescence**

Pavel A. Kotin<sup>\*1</sup>, Sergey S. Bubenov<sup>1</sup>, Natalia E. Mordvinova<sup>1,2</sup> and Sergey G. Dorofeev<sup>1</sup>

Address: <sup>1</sup>Department of Chemistry, Lomonosov Moscow State University, 1 building 3 Leninskie Gory, Moscow 119991, Russia and <sup>2</sup>Laboratoire CRISMAT, UMR6508, CNRS-ENSICAEN, 6 boulevard Marechal Juin, Caen 14050, France

Email: Pavel Aleksandrovich Kotin\* - kotin-pa@mail.ru

\* Corresponding author

## **Additional figures, data and experimental information**

## Additional TEM images of samples

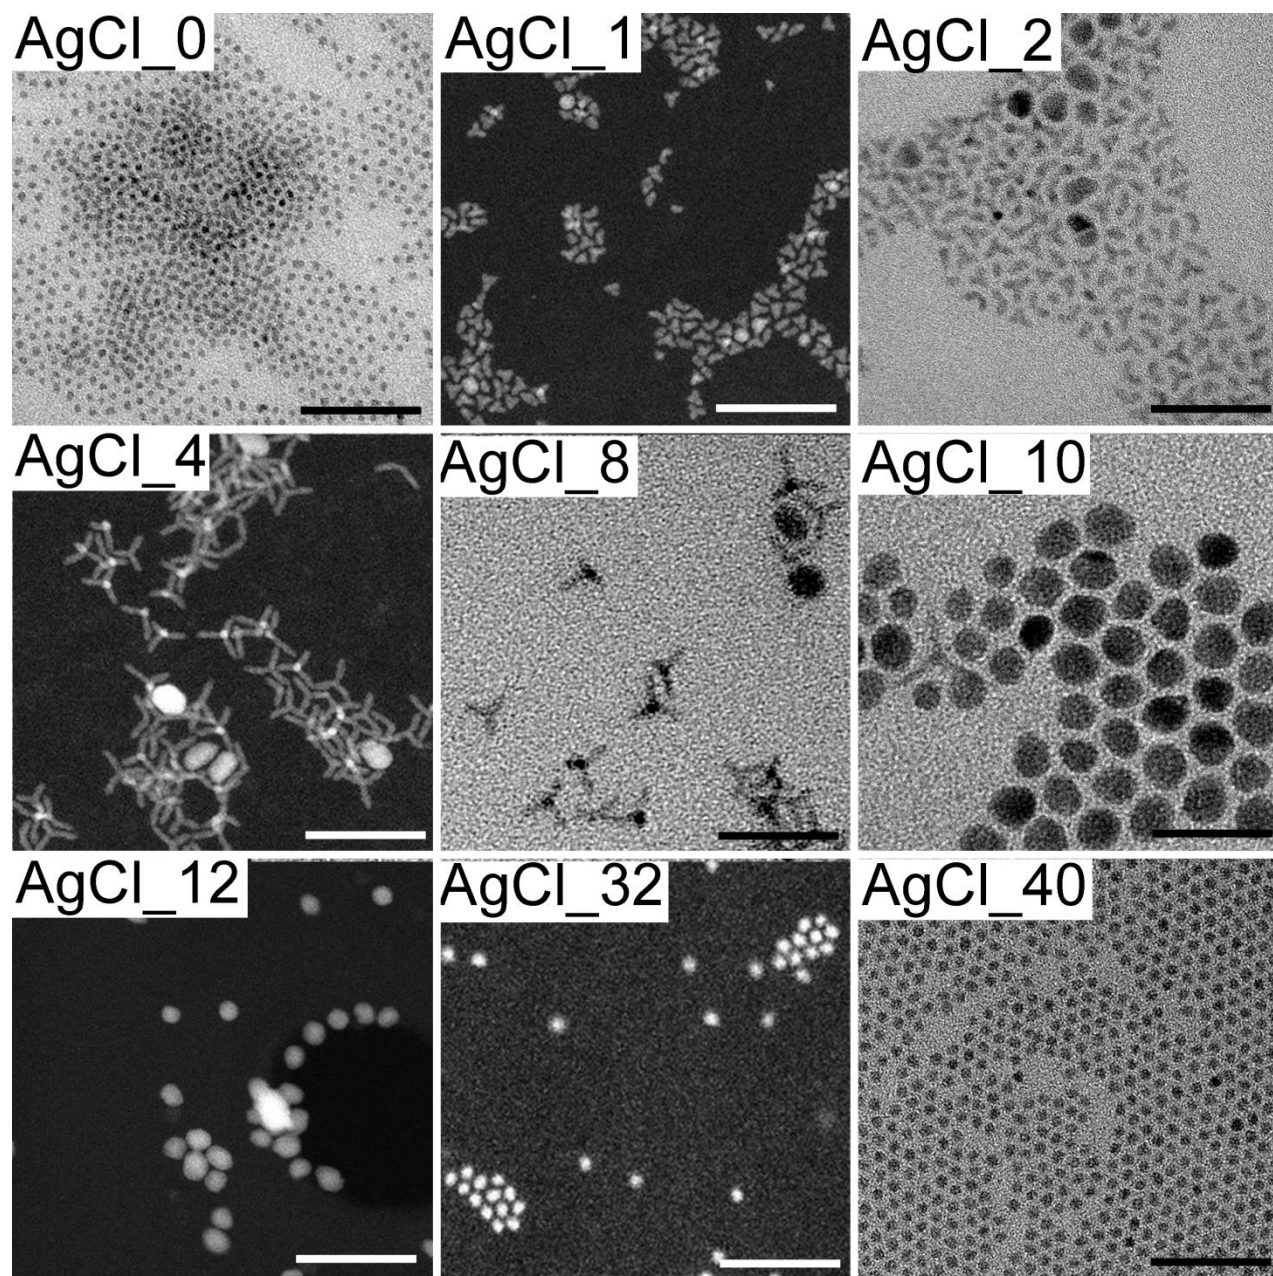

**Figure S1:** TEM images of samples AgCl\_0 to AgCl\_40. The scale bar is 50 nm.

## Additional XRD pattern

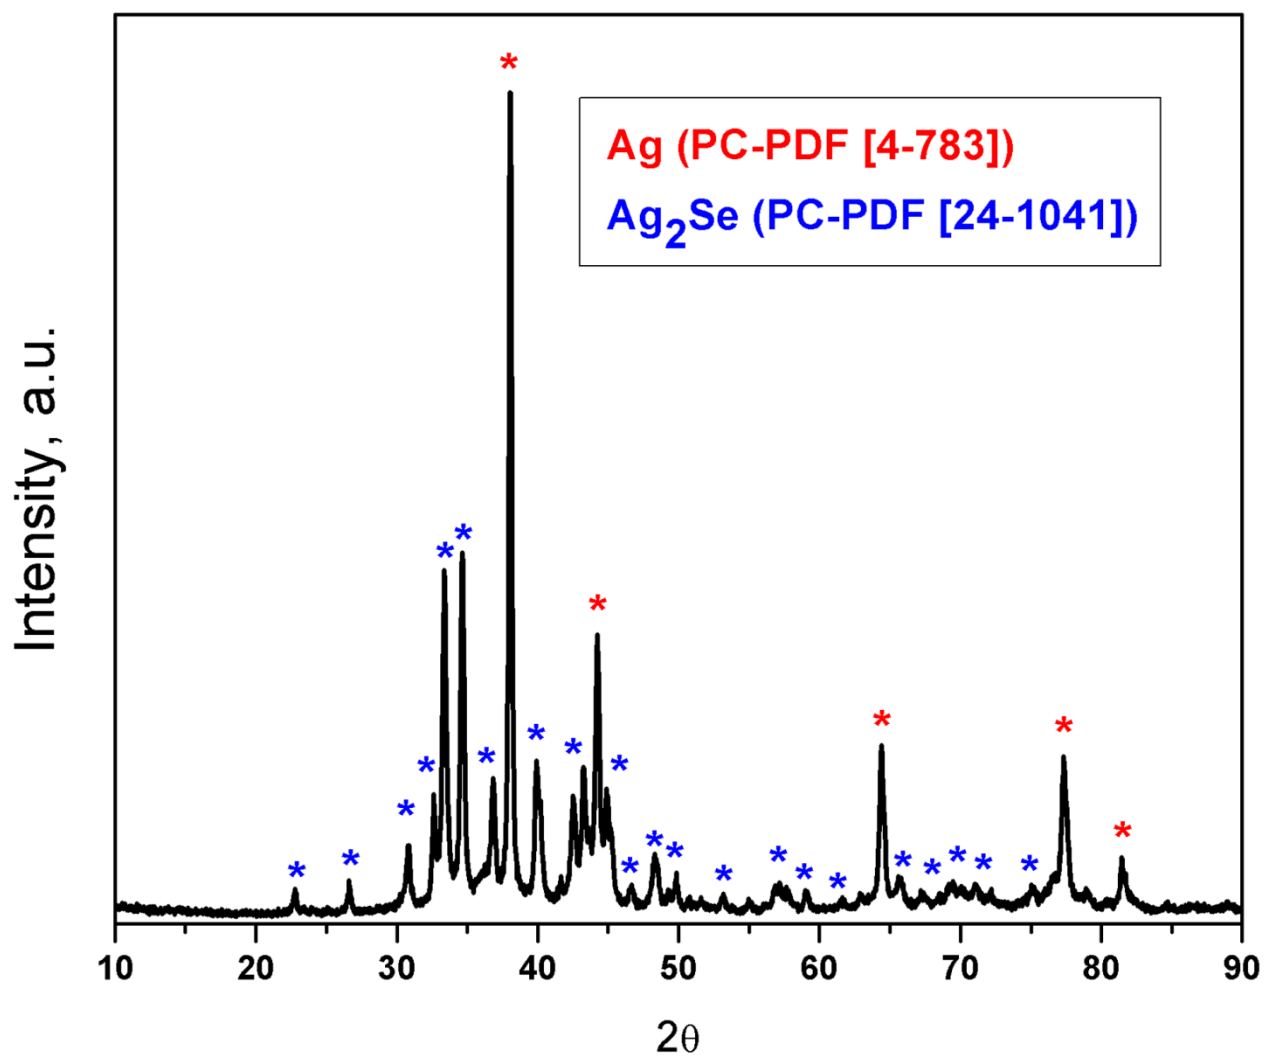

**Figure S2:** XRD pattern of deposition from the Sample AgCl<sub>40</sub> during the storage.

## Additional optical data

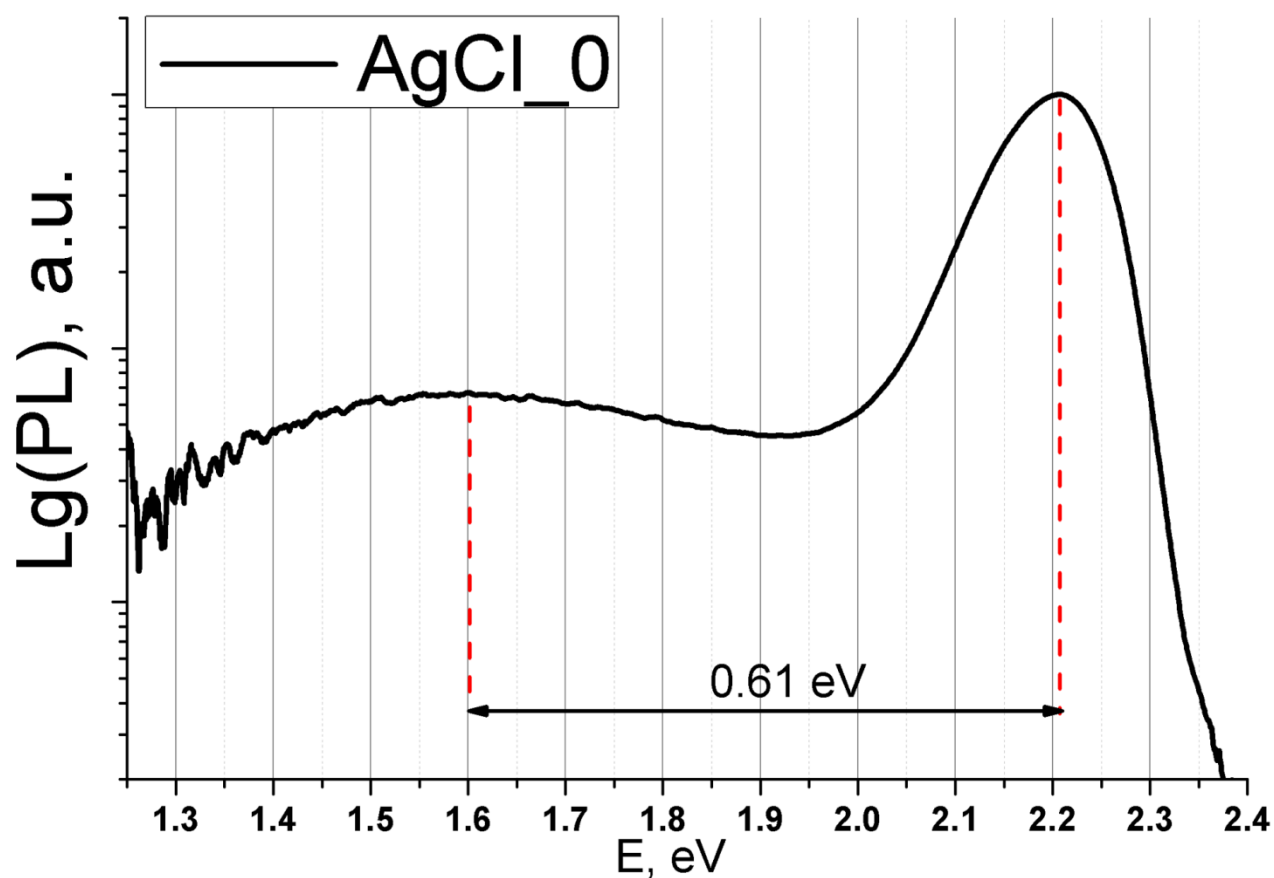

**Figure S3:** Semi-log plot of PL spectrum of undoped CdSe QDs.

**Table S1:** Positions of exciton bands, LEPs and energy difference between them.

| Sample  | Exciton, eV | LEP, eV         | $\Delta E$ , eV |
|---------|-------------|-----------------|-----------------|
| AgCl_0  | 2.21        | 1.6 (spherical) | 0.61            |
| AgCl_1  | 1.82        | —               | —               |
| AgCl_2  | 1.80        | 1.36            | 0.42            |
| AgCl_4  | 1.78        | 1.44            | 0.34            |
| AgCl_8  | 1.78        | 1.34            | 0.44            |
| AgCl_10 | 1.79        | 1.34            | 0.45            |

|         |      |      |      |
|---------|------|------|------|
| AgCl_12 | 1.82 | 1.36 | 0.46 |
| AgCl_16 | 1.85 | 1.40 | 0.45 |
| AgCl_24 | 1.92 | 1.42 | 0.50 |
| AgCl_32 | 2.03 | 1.52 | 0.51 |
| AgCl_40 | 2.07 | 1.57 | 0.50 |

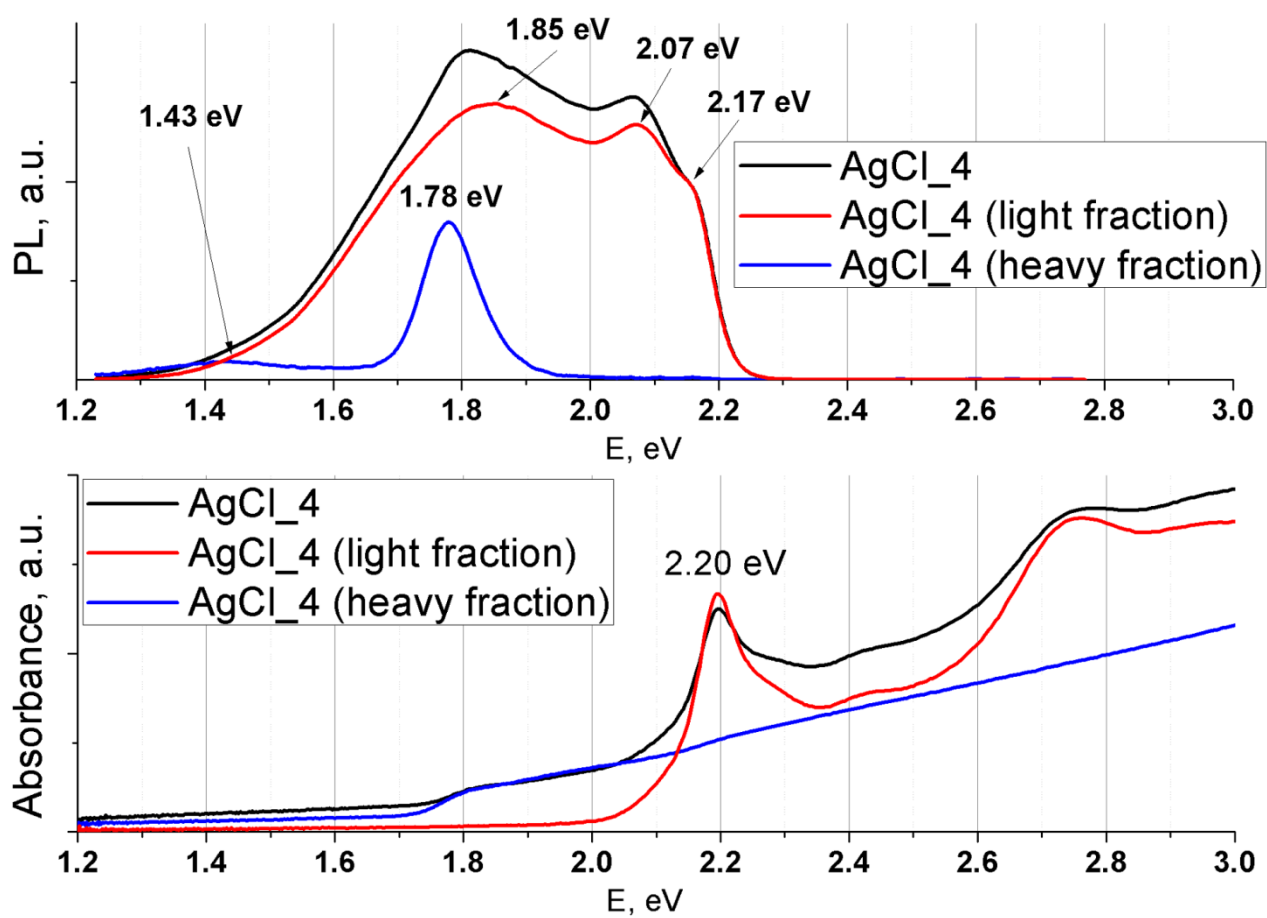

**Figure S4:** PL spectra (top) and absorbance (bottom) of different fractions of sample AgCl\_4.

## **The procedure of separation between different fractions**

Separation of TPs and EPs was performed by centrifugation in a high-speed centrifuge (21000g). We refer to EPs as heavy fraction and to TPs as light fraction. Slow deposition of TPs is due to higher hydrodynamic size-mass ratio and larger surface area (which results in a larger number of ligands and increased solubility) than that of EPs.

The typical procedure of isolation of heavy fraction implies a number of 5 min centrifugations. The fraction was selected from the bottom of centrifuge tube. A series of short time acts is required to prevent the coprecipitation of light fraction. Isolation of EPs from the sample AgCl\_1 required five iterations of 5 min centrifuging, for the Samples AgCl\_2, AgCl\_4, AgCl\_8, AgCl\_10 it required four, four, two and one iterations of 5 minute centrifuging respectively.

The procedure of isolation of light fraction implies three 30 min centrifugations. The fraction was selected from the top of the centrifuge tube. A long time is required to fully remove the heavy fraction.

## **Purity of reagents**

The starting chemicals used were cadmium acetate,  $\text{Cd}(\text{CH}_3\text{COO})_2 \cdot 2\text{H}_2\text{O}$  (analytical-grade); silver chloride, AgCl (analytical-grade); oleic acid (Fluke, 95%); trioctylphosphine (TOP) (Aldrich, 90%); selenium (extrapure grade); acetone, hexane and dodecane (extrapure grade); diphenyl ether (abcr, 99%).
